# Supplementary material
Source: MDPI journal article supplement (https://www.mdpi.com/1996-1073/16/17/6372)
Supplement: s1 [file s1]

Supporting Information

**Thermogravimetric pyrolysis behavior and kinetic study of  
two different organic-rich mudstones via multiple kinetic  
methods**

Yaoyu Li <sup>1,2,3</sup>, Shixin Zhou <sup>1,2,\*</sup>, Jing Li <sup>1,2,\*</sup>, Zexiang Sun <sup>1,2</sup> and Wenjun Pang <sup>1,2,3</sup>

<sup>1</sup> *Northwest Institute of Eco-Environment and Resources, Chinese Academy of Sciences, Lanzhou 730000, China; 15101212030@163.com (W.P.)*

<sup>2</sup> *Key Laboratory of Petroleum Resources, Lanzhou 730000, China*

<sup>3</sup> *University of Chinese Academy of Sciences, Beijing 100049, China*

*\* Correspondence: zhoushixin@nieer.ac.cn (S.Z.); lj1926@lzb.ac.cn (J.L.)*

**Supplementary Tables and Figures**

## Tables

**Table S1.** Calculation results of the activation energy and reaction mechanism of MP using Coats-Redfern method.

| Model           | 5 K/min |                | 10 K/min |                | 20 K/min |                | 40 K/min |                | Average E | Average R <sup>2</sup> |
|-----------------|---------|----------------|----------|----------------|----------|----------------|----------|----------------|-----------|------------------------|
|                 | E       | R <sup>2</sup> | E        | R <sup>2</sup> | E        | R <sup>2</sup> | E        | R <sup>2</sup> |           |                        |
| F1              | 125.56  | 0.95608        | 138.18   | 0.94507        | 137.35   | 0.93584        | 139.84   | 0.92974        | 135.23    | 0.94168                |
| F2              | 187.05  | 0.98380        | 208.74   | 0.98047        | 209.06   | 0.97857        | 212.01   | 0.97575        | 204.21    | 0.97965                |
| F3              | 265.15  | 0.97997        | 298.46   | 0.9817         | 299.28   | 0.98311        | 304.310  | 0.98317        | 291.80    | 0.98199                |
| F4              | 352.09  | 0.96890        | 398.41   | 0.97372        | 400.93   | 0.97703        | 406.67   | 0.97832        | 389.53    | 0.97449                |
| P2              | 36.66   | 0.85161        | 39.93    | 0.82731        | 39.57    | 0.80936        | 40.07    | 0.79261        | 39.06     | 0.82022                |
| R2              | 102.68  | 0.92536        | 111.95   | 0.90887        | 111.80   | 0.89892        | 113.51   | 0.88869        | 109.99    | 0.90546                |
| D1              | 182.06  | 0.90058        | 197.53   | 0.88284        | 195.46   | 0.86862        | 198.73   | 0.8574         | 193.44    | 0.87736                |
| D2              | 202.60  | 0.91997        | 244.16   | 0.93361        | 219.17   | 0.8926         | 222.65   | 0.88241        | 222.15    | 0.90715                |
| D-ZLT3          | 299.19  | 0.97296        | 330.39   | 0.96523        | 330.66   | 0.96061        | 334.41   | 0.95464        | 323.66    | 0.96336                |
| A1/2            | 262.64  | 0.96028        | 288.52   | 0.94981        | 288.48   | 0.94341        | 291.99   | 0.93572        | 282.91    | 0.94731                |
| A2/3            | 193.95  | 0.95888        | 213.76   | 0.94865        | 212.94   | 0.94117        | 215.94   | 0.93394        | 209.15    | 0.94566                |
| F1(0.05-0.75)   | 154.86  | 0.99143        | 179.70   | 0.99397        | 185.84   | 0.99542        | 194.85   | 0.99635        | 178.81    | 0.99429                |
| A2/3(0.05-0.75) | 237.98  | 0.99271        | 256.37   | 0.99701        | 284.84   | 0.9965         | 298.21   | 0.99732        | 269.35    | 0.99589                |

|                 |        |         |        |         |        |         |        |         |        |         |
|-----------------|--------|---------|--------|---------|--------|---------|--------|---------|--------|---------|
| A5/6(0.05-0.75) | 190.38 | 0.99312 | 219.16 | 0.99534 | 227.26 | 0.99672 | 233.99 | 0.99763 | 218.85 | 0.99570 |
| F3(0.75-0.95)   | 214.47 | 0.98806 | 223.74 | 0.97833 | 219.70 | 0.98171 | 215.99 | 0.98202 | 218.47 | 0.98253 |

**Table S2.** Calculation results of the activation energy and reaction mechanism of UC (Peak I) using Coats-Redfern method.

| Model           | 5 K/min |                | 10 K/min |                | 20 K/min |                | 40 K/min |                | Average E | Average R <sup>2</sup> |
|-----------------|---------|----------------|----------|----------------|----------|----------------|----------|----------------|-----------|------------------------|
|                 | E       | R <sup>2</sup> | E        | R <sup>2</sup> | E        | R <sup>2</sup> | E        | R <sup>2</sup> |           |                        |
| F1              | 127.30  | 0.99639        | 128.50   | 0.99585        | 126.85   | 0.99341        | 129.33   | 0.99444        | 128.00    | 0.99502                |
| F2              | 181.71  | 0.98573        | 184.48   | 0.98684        | 183.63   | 0.99099        | 186.94   | 0.98984        | 184.19    | 0.98835                |
| F3              | 250.13  | 0.95346        | 254.49   | 0.95531        | 255.04   | 0.96372        | 259.85   | 0.96133        | 254.88    | 0.95846                |
| P2              | 39.23   | 0.94816        | 39.30    | 0.94334        | 38.15    | 0.92862        | 38.86    | 0.93232        | 38.88     | 0.93811                |
| R2              | 106.65  | 0.98417        | 107.39   | 0.98231        | 105.33   | 0.97551        | 107.65   | 0.97815        | 106.75    | 0.98004                |
| D1              | 191.74  | 0.96592        | 192.820  | 0.96307        | 189.24   | 0.95419        | 193.12   | 0.95713        | 191.73    | 0.96008                |
| D2              | 211.59  | 0.97870        | 212.960  | 0.9765         | 209.16   | 0.96925        | 213.84   | 0.9721         | 211.89    | 0.97414                |
| D-ZLT3          | 298.81  | 0.99770        | 302.33   | 0.99786        | 299.74   | 0.99793        | 305.64   | 0.99814        | 301.63    | 0.99791                |
| A1/2            | 266.33  | 0.99677        | 268.90   | 0.99629        | 266.05   | 0.99417        | 271.01   | 0.99499        | 268.07    | 0.99556                |
| A2/3            | 196.77  | 0.99663        | 198.77   | 0.99617        | 196.49   | 0.99396        | 200.30   | 0.9949         | 198.08    | 0.99542                |
| A1/2 (0.05-0.2) | 248.08  | 0.99970        | 254.00   | 0.99975        | 261.28   | 0.99977        | 266.16   | 0.99988        | 257.38    | 0.99978                |
| A2/3 (0.05-0.2) | 183.31  | 0.99970        | 187.70   | 0.99975        | 193.09   | 0.99976        | 196.69   | 0.99987        | 190.20    | 0.99977                |

|                |        |         |        |         |        |         |        |         |        |         |
|----------------|--------|---------|--------|---------|--------|---------|--------|---------|--------|---------|
| A1/2 (0.2-0.7) | 297.66 | 0.99991 | 300.66 | 0.99992 | 300.06 | 0.99983 | 302.80 | 0.99992 | 300.29 | 0.99990 |
| A2/3 (0.2-0.7) | 220.32 | 0.99990 | 222.50 | 0.99992 | 221.97 | 0.99982 | 223.98 | 0.99991 | 222.20 | 0.99989 |
| A4/5 (0.2-0.7) | 181.63 | 0.99990 | 183.43 | 0.99991 | 182.96 | 0.99982 | 184.59 | 0.99991 | 183.15 | 0.99989 |
| F2 (0.7-0.95)  | 224.99 | 0.99978 | 223.50 | 0.99946 | 207.88 | 0.99921 | 215.98 | 0.99884 | 218.09 | 0.99932 |

**Table S3.** Calculation results of the activation energy and reaction mechanism of UC (Peak II) using Coats-Redfern method.

| Model          | 5 K/min |                | 10 K/min |                | 20 K/min |                | 40 K/min |                | Average E | Average R <sup>2</sup> |
|----------------|---------|----------------|----------|----------------|----------|----------------|----------|----------------|-----------|------------------------|
|                | E       | R <sup>2</sup> | E        | R <sup>2</sup> | E        | R <sup>2</sup> | E        | R <sup>2</sup> |           |                        |
| F1             | 128.00  | 0.96746        | 120.37   | 0.95464        | 119.73   | 0.95785        | 110.82   | 0.94651        | 119.73    | 0.95662                |
| F2             | 185.43  | 0.99343        | 177.85   | 0.99064        | 177.29   | 0.99068        | 166.31   | 0.98694        | 176.72    | 0.99042                |
| F3             | 256.88  | 0.98118        | 250.14   | 0.98308        | 249.36   | 0.9809         | 236.56   | 0.98028        | 248.24    | 0.98136                |
| P2             | 37.41   | 0.84165        | 33.61    | 0.79651        | 33.06    | 0.79838        | 29.24    | 0.75543        | 33.33     | 0.79799                |
| R2             | 105.81  | 0.93080        | 98.17    | 0.91024        | 97.64    | 0.9145         | 89.76    | 0.89657        | 97.84     | 0.91303                |
| D1             | 189.63  | 0.89650        | 174.59   | 0.87155        | 174.13   | 0.87663        | 160.09   | 0.85652        | 174.61    | 0.87530                |
| D2             | 211.06  | 0.92301        | 195.98   | 0.90248        | 195.47   | 0.90695        | 180.35   | 0.89063        | 195.72    | 0.90577                |
| D-ZLT3         | 303.61  | 0.98441        | 288.45   | 0.97685        | 287.49   | 0.97917        | 269.06   | 0.97183        | 287.15    | 0.97807                |
| A2/3           | 198.53  | 0.96973        | 187.31   | 0.95801        | 186.43   | 0.96126        | 173.26   | 0.95120        | 186.38    | 0.96005                |
| F1 (0.05-0.34) | 203.70  | 0.99582        | 217.50   | 0.99209        | 213.80   | 0.98855        | 220.81   | 0.98210        | 213.95    | 0.98964                |

|                  |        |         |        |         |        |         |        |         |        |         |
|------------------|--------|---------|--------|---------|--------|---------|--------|---------|--------|---------|
| A2 (0.05-0.34)   | 95.58  | 0.99520 | 102.46 | 0.99100 | 100.34 | 0.98692 | 103.69 | 0.97962 | 100.52 | 0.98819 |
| A1.5 (0.05-0.34) | 131.82 | 0.99544 | 141.34 | 0.99314 | 138.49 | 0.98758 | 143.30 | 0.98056 | 138.74 | 0.98918 |
| F2 (0.34-0.78)   | 157.39 | 0.99972 | 148.23 | 0.99967 | 148.74 | 0.99979 | 136.43 | 0.99962 | 147.70 | 0.99970 |
| F1 (0.78-0.95)   | 106.60 | 0.99357 | 89.92  | 0.99635 | 98.27  | 0.99248 | 91.59  | 0.99158 | 96.60  | 0.99350 |
| A2/3 (0.78-0.95) | 166.59 | 0.99416 | 141.83 | 0.99674 | 154.84 | 0.99315 | 144.94 | 0.9925  | 152.05 | 0.99414 |
| A3/4 (0.78-0.95) | 147.50 | 0.99351 | 132.56 | 0.9935  | 136.12 | 0.99293 | 127.97 | 0.99172 | 136.04 | 0.99292 |

---

**Table S4.** The linear equation of E and InA and kinetic parameters at different heating rates.

| Sample     | Heating rate | Equation         | R <sup>2</sup> | Initial A                         |
|------------|--------------|------------------|----------------|-----------------------------------|
| MP         | 5            | InA=0.169E-3.612 | 0.98689        | 1.41×10 <sup>12</sup> (0.05-0.75) |
|            |              |                  |                | 5.18×10 <sup>13</sup> (0.75-0.95) |
|            | 10           | InA=0.166E-2.968 | 0.98992        | 1.43×10 <sup>12</sup> (0.05-0.75) |
|            |              |                  |                | 4.89×10 <sup>13</sup> (0.75-0.95) |
|            | 20           | InA=0.162E-2.349 | 0.98849        | 1.46×10 <sup>12</sup> (0.05-0.75) |
|            |              |                  |                | 4.72×10 <sup>13</sup> (0.75-0.95) |
|            | 40           | InA=0.159E-1.694 | 0.98815        | 1.45×10 <sup>12</sup> (0.05-0.75) |
|            |              |                  |                | 4.31×10 <sup>13</sup> (0.75-0.95) |
| UC-Peak I  | 5            | InA=0.170E-3.176 | 0.98801        | 9.21×10 <sup>11</sup> (0.05-0.2)  |
|            |              |                  |                | 3.33×10 <sup>12</sup> (0.2-0.7)   |
|            |              |                  |                | 2.33×10 <sup>12</sup> (0.7-0.95)  |
|            | 10           | InA=0.167E-2.552 | 0.98778        | 9.77×10 <sup>11</sup> (0.05-0.2)  |
|            |              |                  |                | 3.45×10 <sup>12</sup> (0.2-0.7)   |
|            |              |                  |                | 2.43×10 <sup>12</sup> (0.7-0.95)  |
|            | 20           | InA=0.167E-1.983 | 0.98705        | 9.24×10 <sup>11</sup> (0.05-0.2)  |
|            |              |                  |                | 3.12×10 <sup>12</sup> (0.2-0.7)   |
|            |              |                  |                | 2.22×10 <sup>12</sup> (0.7-0.95)  |
| UC-Peak II | 5            | InA=0.150E-2.848 | 0.98590        | 9.88×10 <sup>11</sup> (0.05-0.2)  |
|            |              |                  |                | 3.31×10 <sup>12</sup> (0.2-0.7)   |
|            |              |                  |                | 2.37×10 <sup>12</sup> (0.7-0.95)  |
|            | 10           | InA=0.149E-2.878 | 0.98387        | 3.69×10 <sup>8</sup> (0.05-0.34)  |
|            |              |                  |                | 1.50×10 <sup>8</sup> (0.34-0.78)  |
|            |              |                  |                | 2.42×10 <sup>7</sup> (0.78-0.95)  |
|            | 20           | InA=0.145E-2.270 | 0.98559        | 3.79×10 <sup>8</sup> (0.05-0.34)  |
|            |              |                  |                | 1.54×10 <sup>8</sup> (0.34-0.78)  |
|            |              |                  |                | 2.50×10 <sup>7</sup> (0.78-0.95)  |
| UC-Peak II | 40           | InA=0.144E-1.922 | 0.97999        | 3.18×10 <sup>8</sup> (0.05-0.34)  |
|            |              |                  |                | 1.32×10 <sup>8</sup> (0.34-0.78)  |
|            |              |                  |                | 2.27×10 <sup>7</sup> (0.78-0.95)  |
| UC-Peak II | 40           | InA=0.144E-1.922 | 0.97999        | 4.09×10 <sup>8</sup> (0.05-0.34)  |
|            |              |                  |                | 1.71×10 <sup>8</sup> (0.34-0.78)  |
| UC-Peak II | 40           | InA=0.144E-1.922 | 0.97999        | 2.96×10 <sup>7</sup> (0.78-0.95)  |
|            |              |                  |                |                                   |

**Table S5.** The final pre-exponential factors A and the correlation coefficients  $R^2$  between experimental data and simulated data of MP.

| Heating rate | $\alpha \in (0-0.75)$ |         | $\alpha \in (0.75-1)$ |         |
|--------------|-----------------------|---------|-----------------------|---------|
|              | A                     | $R_2$   | A                     | $R_2$   |
| 5 K/min      | $5.28 \times 10^{12}$ | 0.99134 | $2.52 \times 10^{15}$ | 0.91767 |
| 10 K/min     | $5.35 \times 10^{12}$ | 0.98632 | $2.38 \times 10^{15}$ | 0.94258 |
| 20 K/min     | $5.53 \times 10^{12}$ | 0.98453 | $2.30 \times 10^{15}$ | 0.92736 |
| 40 K/min     | $5.45 \times 10^{12}$ | 0.97775 | $2.10 \times 10^{15}$ | 0.91650 |
| Average      | $5.40 \times 10^{12}$ | 0.98499 | $2.32 \times 10^{15}$ | 0.92603 |

**Table S6.** The final pre-exponential factors A and the correlation coefficients  $R^2$  between experimental data and simulated data of UC-Peak I.

| Heating rate | $\alpha \in (0-0.2)$  |         | $\alpha \in (0.2-0.7)$ |         | $\alpha \in (0.7-1)$  |         |
|--------------|-----------------------|---------|------------------------|---------|-----------------------|---------|
|              | A                     | $R_2$   | A                      | $R_2$   | A                     | $R_2$   |
| 5            | $9.76 \times 10^{11}$ | 0.98908 | $6.36 \times 10^{12}$  | 0.96828 | $9.07 \times 10^{12}$ | 0.98876 |
| 10           | $1.04 \times 10^{12}$ | 0.98679 | $6.60 \times 10^{12}$  | 0.97320 | $9.46 \times 10^{12}$ | 0.98386 |
| 20           | $9.79 \times 10^{11}$ | 0.98540 | $5.97 \times 10^{12}$  | 0.93161 | $8.63 \times 10^{12}$ | 0.97015 |
| 40           | $1.05 \times 10^{12}$ | 0.98693 | $6.33 \times 10^{12}$  | 0.96736 | $9.21 \times 10^{12}$ | 0.97357 |
| Average      | $1.01 \times 10^{12}$ | 0.98705 | $6.32 \times 10^{12}$  | 0.96011 | $9.09 \times 10^{12}$ | 0.97909 |

**Table S7.** The final pre-exponential factors A and the correlation coefficients  $R^2$ 

between experimental data and simulated data of UC-Peak II.

| Heating<br>rate | $\alpha \in (0-0.34)$ |         | $\alpha \in (0.34-0.78)$ |         | $\alpha \in (0.78-1)$ |         |
|-----------------|-----------------------|---------|--------------------------|---------|-----------------------|---------|
|                 | A                     | $R_2$   | A                        | $R_2$   | A                     | $R_2$   |
| 5               | $8.18 \times 10^8$    | 0.97582 | $7.37 \times 10^7$       | 0.98945 | $9.61 \times 10^5$    | 0.98686 |
| 10              | $8.38 \times 10^8$    | 0.98135 | $7.58 \times 10^7$       | 0.98410 | $9.94 \times 10^5$    | 0.96343 |
| 20              | $7.03 \times 10^8$    | 0.98362 | $6.52 \times 10^7$       | 0.99004 | $9.02 \times 10^5$    | 0.97204 |
| 40              | $9.06 \times 10^8$    | 0.94376 | $8.44 \times 10^7$       | 0.93584 | $1.18 \times 10^6$    | 0.93998 |
| Average         | $8.16 \times 10^8$    | 0.97114 | $7.48 \times 10^7$       | 0.97486 | $1.01 \times 10^6$    | 0.93998 |



## Figures

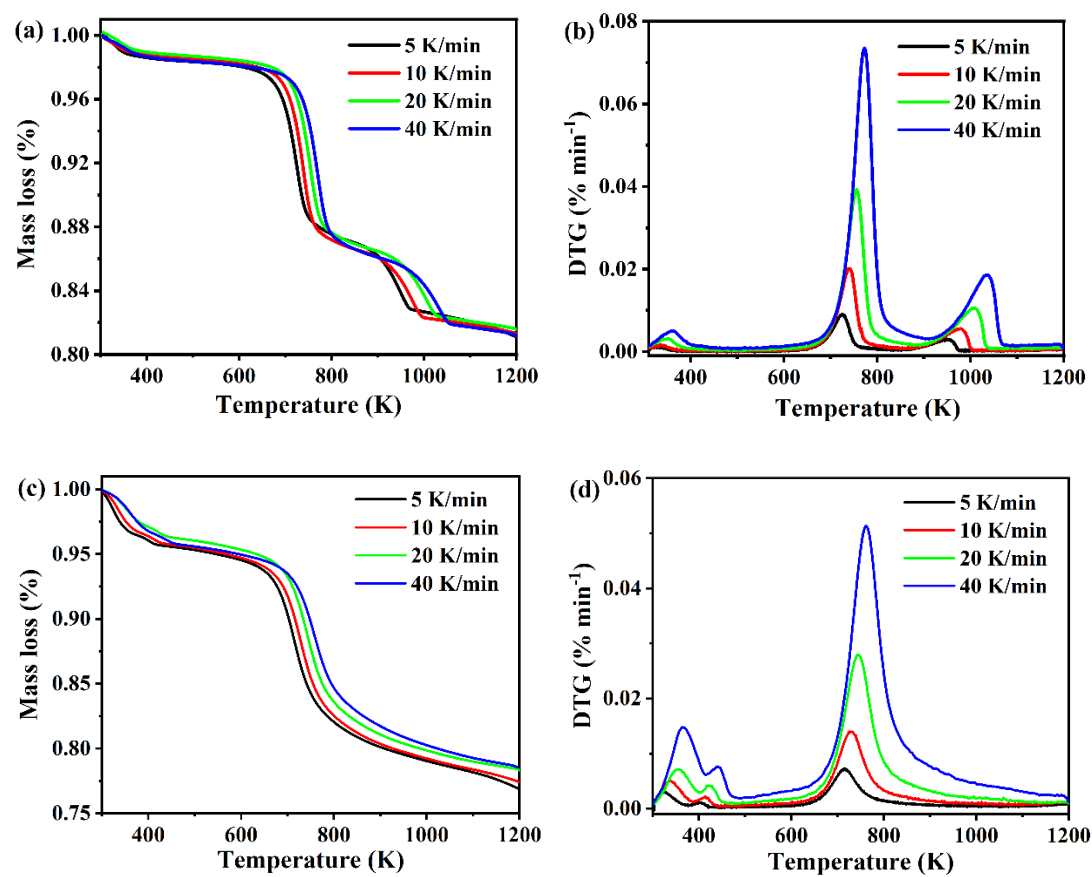

**Figure S1.** TG and DTG curves of (a, b) MP; (c, d) UC.

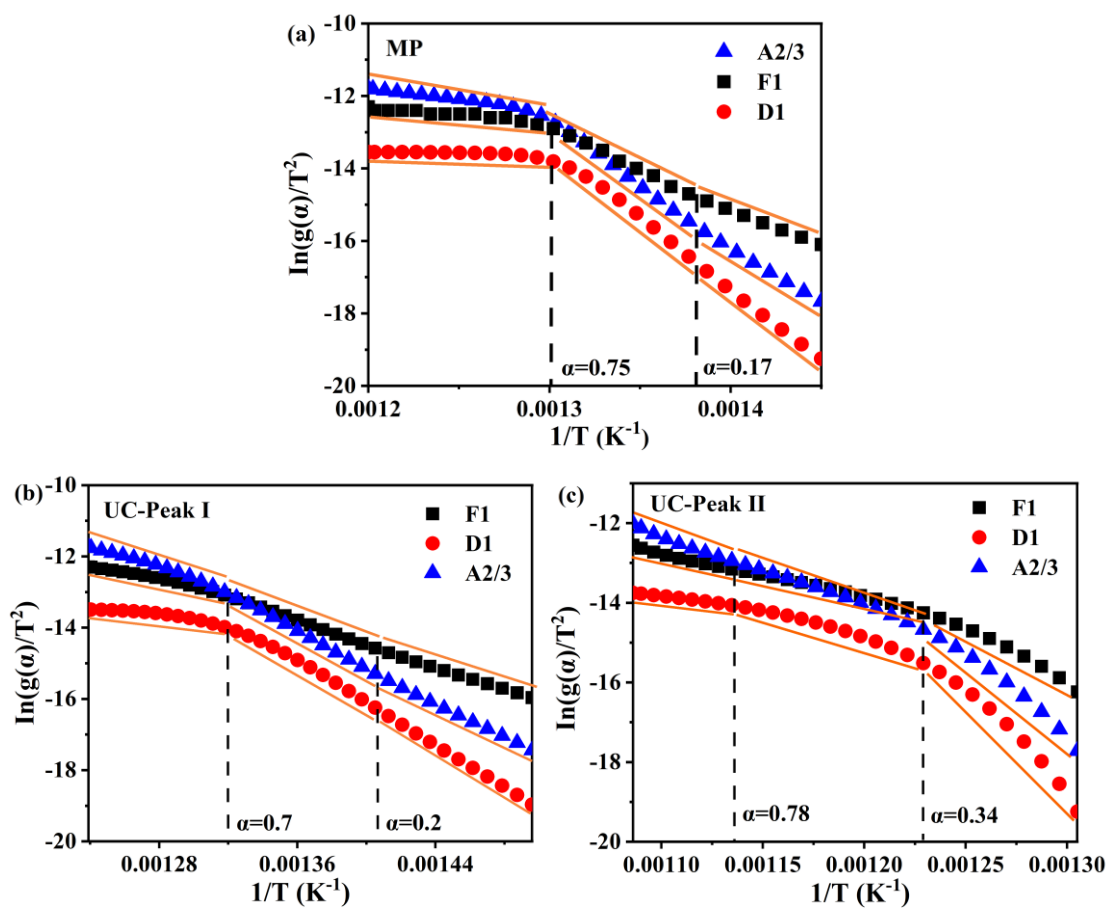

**Figure S2.** The plot of  $\ln(g(\alpha)/T^2)$  against  $1/T$  when the reaction model is F<sub>1</sub>, D<sub>1</sub> and

A<sub>2/3</sub> at 20 K/min for (a) MP; (b) UC-Peak I; (c) UC-Peak II.
